# Supplementary material for: Rational Engineering of a Flavoprotein Oxidase for Improved Direct Oxidation of Alcohols to Carboxylic Acids
Source: Molecules. 2017 Dec 12;22(12):2205. doi: 10.3390/molecules22122205 (PMC6149797; doi:10.3390/molecules22122205)
Supplement: Supplementary file 1 [file molecules-22-02205-s001.pdf]

# **Rational engineering of a flavoprotein oxidase for improved direct oxidation of alcohols to carboxylic acids**

Mathias Pickl,<sup>b</sup> Christoph K. Winkler,<sup>a,b</sup> Silvia M. Glueck,<sup>a,b</sup> Marco W. Fraaije,<sup>c</sup> Kurt Faber<sup>b\*</sup>

<sup>a</sup> Austrian Centre of Industrial Biotechnology, ACIB GmbH c/o

<sup>b</sup> Department of Chemistry, University of Graz, Heinrichstrasse 28, A-8010 Graz, Austria

<sup>c</sup> Molecular Enzymology Group, Groningen Biomolecular Sciences and Biotechnology Institute,  
University of Groningen, Nijenborgh 4, 9747 AG Groningen, The Netherlands.

*Corresponding author: kurt.faber@uni-graz.at*

## **Electronic Supplementary Material**

### **General**

Benzylic alcohols, benzaldehydes and catalase from *M. lysodeikticus* were obtained from Sigma Aldrich (Steinheim, Germany). The biotransformations were accomplished in a HT Infors Unitron AJ 260 at 120 rpm and 30 °C (vials in horizontal position). Molecular biology enzymes and stock solutions were purchased from Thermo Scientific (Vienna, Austria). All products were identified by comparison with authentic reference material.

### **Site-directed mutagenesis**

A typical PCR mixture (25 µL) contained template DNA (10 ng), forward or reverse primer (1.25 µL, 0.1 µM) and a master mix [50 µL master mix contain Phusion Polymerase (0.5 µL), GC buffer (10 µL), DMSO (5 % v/v) and dNTPs (1 µL of 10 mM stock)]. After three cycles of linear PCR, the mixture containing the forward primer and the mixture of the reverse primer were combined. Template DNA was cleaved with *DpnI* (New England Bio-Labs). The plasmid was purified with a PCR purification kit (Qiagen) and transformed into *E. coli* TOP10 cells. The introduction of the mutations was confirmed by sequencing (Microsynth AG, Balgach, Switzerland). The primers are listed in Table S1.

**Table S1:** Primers used for site-directed mutagenesis. For all primers, the mutated codon is underlined.

| Primer name            | Sequence (from 5' to 3')                     |
|------------------------|----------------------------------------------|
| Trp466Phe-fw           | AACGTCGGCGGTGTT <u>TTT</u> TTCATGCGAGCGG     |
| Trp466Phe-rv           | CCGCTCGCATG <u>AAAA</u> ACACCGCCGACGTT       |
| Trp466Ala-fw           | CGTCGGCGGTGTTG <u>CAC</u> ATGCGAGCG          |
| Trp466Ala-rv           | CGCTCGCATGTG <u>CA</u> ACACCGCCGACG          |
| Trp466Tyr-fw           | CGTCGGCGGTGTTT <u>TAT</u> TCATGCGAGCG        |
| Trp466Tyr-rv           | CGCTCGCATG <u>GATA</u> AAACACCGCCGACG        |
| Trp466Asn-fw           | CGTCGGCGGTGTTA <u>AT</u> TCATGCGAGCG         |
| Trp466Asn-rv           | CGCTCGCATG <u>ATT</u> AACACCGCCGACG          |
| Trp466Gln-fw           | CGTCGGCGGTGTT <u>CA</u> ACATGCGAGCG          |
| Trp466Gln-rv           | CGCTCGCATGT <u>TGA</u> ACACCGCCGACG          |
| Trp466Ser-fw           | CGTCGGCGGTGTTAG <u>CC</u> ATGCGAGCG          |
| Trp466Ser-rv           | CGCTCGCATG <u>GCT</u> AACACCGCCGACG          |
| Trp466Thr-fw           | CGTCGGCGGTGTTA <u>CC</u> ATGCGAGCG           |
| Trp466Thr-rv           | CGCTCGCATG <u>GGT</u> AACACCGCCGACG          |
| Trp466Arg-fw           | CGTCGGCGGTGTT <u>CGT</u> CATGCGAGCG          |
| Trp466Arg-rv           | CGCTCGCATG <u>ACG</u> AACACCGCCGACG          |
| Trp466Lys-fw           | CGTCGGCGGTGTTA <u>AA</u> CATGCGAGCG          |
| Trp466Lys-rv           | CGCTCGCATGT <u>TTT</u> AACACCGCCGACG         |
| Trp466Asp-fw           | CGTCGGCGGTGTTG <u>AT</u> CATGCGAGCG          |
| Trp466Asp-rv           | CGCTCGCATGAT <u>CA</u> ACACCGCCGACG          |
| Trp466Glu-fw           | CGTCGGCGGTGTTG <u>AA</u> CATGCGAGCG          |
| Trp466Glu-rv           | CGCTCGCATGT <u>TTCA</u> ACACCGCCGACG         |
| Trp466His-fw           | CGTCGGCGGTGTT <u>CAT</u> CATGCGAGCG          |
| Trp466His-rv           | CGCTCGCATGATG <u>AA</u> ACACCGCCGACG         |
| Val465Ser-fw           | CGGCGGT <u>AGC</u> TGGCATGCGAGCGGCACG        |
| Val465Ser-rv           | CGTGCCGCTCGCATGCCAG <u>CT</u> ACCGCCG        |
| Val465Thr-fw           | TACGAACGTCGGCGGT <u>AC</u> CTGGCAT           |
| Val465Thr-rv           | ATGCCAGGTACCGCCGACGTT <u>CG</u> TA           |
| Val465Asp-fw           | TACGAACGTCGGCGGTG <u>ATT</u> TGGCAT          |
| Val465Asp-rv           | ATGCCAATCACC <u>CG</u> CCGACGTT <u>CG</u> TA |
| Val465Thr-Trp466His-fw | GAACGTCGGCGGT <u>TACC</u> CATCATGCG          |
| Val465Thr-Trp466His-rv | CGCATGATGGGT <u>TACC</u> CCGACGTT            |

## Aldehyde hydration

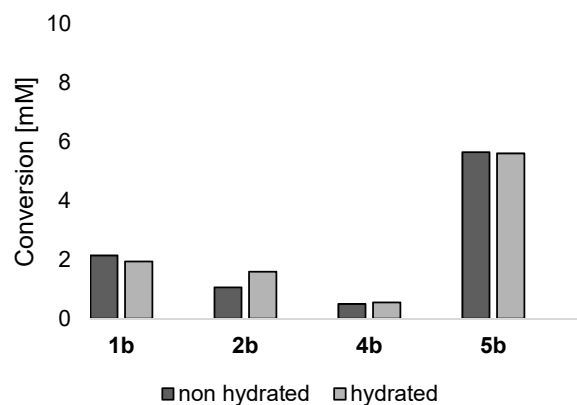

**Figure S1** Conversion of benzaldehydes **1b**, **2b**, **4b** and **5b** by HMFO wild type with or without preincubation in buffer (sodium phosphate pH 7.0, 100 mM) at room temperature.

## HPLC method

500  $\mu$ L of the reaction mixture were diluted with 500  $\mu$ L MeCN and the protein was denaturated by strong spinning of the sample. From the clear supernatant, the conversion was determined by HPLC equipped with an UV-detector, using a LUNA C18 column (Phenomenex  $\text{\textcircled{R}}$ ) and water and MeCN containing 0.1% trifluoroacetic acid (TFA) as mobile phase with a flow rate of 1 mL/min. In the standard method 100%  $\text{H}_2\text{O}$  were used for 2 min, then a gradient from 0% MeCN to 40% MeCN over 13 min was applied, followed by a gradient to 100% MeCN within 5 min, which was kept for 2 min. Finally 100%  $\text{H}_2\text{O}$  were maintained for 3 min. The retention times are summarized in Table S2.

**Table S2** Retention times of substrates and products

| Compound | $t_R$ | Alcohol [min] | Aldehyde [min] | Carboxylic acid [min] |
|----------|-------|---------------|----------------|-----------------------|
| 1        |       | 15.15         | 17.30          | 18.89                 |
| 2        |       | 18.25         | 20.83          | 20.00                 |
| 3        |       | 16.65         | 19.60          | 18.50                 |
| 4        |       | 15.53         | 19.23          | 17.73                 |
| 5        |       | 16.59         | 19.11          | 18.31                 |

### Protein–ligand docking simulations of benzaldehyde hydrate into HMFO wild type

Docking simulations were performed using the YASARA software (Version 15.3.8) with the HMFO X-ray crystal structure containing the oxidized co-factor (PDB: 4UDP) as template [1]. Substrates were docked into the active site using Autodock Vina with default settings, a cubic simulation cell of 10.0 Å around N5 of FAD and the AMBER03 force field.

### Internal Plasmid Codes

**Table S3** Internal Plasmid Codes

| Plasmid                  | pEG Number |
|--------------------------|------------|
| HMFO-wt                  | pEG387     |
| HMFO-Trp466Ala           | pEG388     |
| HMFO-Trp466Phe           | pEG389     |
| HMFO-Trp466His           | pEG390     |
| HMFO-Trp466Tyr           | pEG391     |
| HMFO-Val465Ser           | pEG392     |
| HMFO-Val465Thr           | pEG393     |
| HMFO-Val465Thr/Trp466Phe | pEG394     |

### Reference

1. Krieger, E.; Vriend, G.; YASARA View - molecular graphics for all devices - from smartphones to workstations. *Bioinformatics* **2014**, *30*, 2981-2982, Available online: 10.1093/bioinformatics/btu426. <https://www.ncbi.nlm.nih.gov/pmc/articles/PMC4184264/> (accessed on: 20 11 2017)
